# Supplementary material for: Predicting the Stability of Organic Matter Originating from Different Waste Treatment Procedures
Source: MDPI journal article supplement (doi:10.3390/ijerph20032151), 2023-01-25
Supplement: s1 [file s1]

Table S1.  $C_{nm}$  (%) of OM in incubated samples

|              |                |                |                |                |                |                |                |
|--------------|----------------|----------------|----------------|----------------|----------------|----------------|----------------|
| Sample       | Manure1        | Manure1-D      | Manure1-C      | Manure1-D-C    | Biowaste2-D    | Biowase2-C     | Biowaste2-D-C1 |
| $C_{nm}$ (%) | 50.9 $\pm$ 1.9 | 67.2 $\pm$ 3.0 | 81.6 $\pm$ 2.5 | 83.6 $\pm$ 3.6 | 75.9 $\pm$ 1.9 | 75.7 $\pm$ 1.9 | 80.2 $\pm$ 1.7 |
| Sample       | Biowaste2-D-C2 | Biowaste1-D    | Biowaste1-C    | Biowaste1-D-C1 | Biowaste1-D-C2 | Vetch1         | Clover1        |
| $C_{nm}$ (%) | 83.3 $\pm$ 1.4 | 75.0 $\pm$ 0.8 | 82.2 $\pm$ 0.9 | 87.8 $\pm$ 2.6 | 94.3 $\pm$ 0.6 | 32.4 $\pm$ 0.9 | 31.5 $\pm$ 1.1 |
| Sample       | Stalk2         | Mix5           | Mix5-C3        | Mix6           | Mix6-C3        | Mix1           | Mix1-C3        |
| $C_{nm}$ (%) | 37.8 $\pm$ 0.6 | 64.9 $\pm$ 0.1 | 69.2 $\pm$ 0.6 | 60.2 $\pm$ 1.6 | 76.5 $\pm$ 0.6 | 69.8 $\pm$ 0.1 | 87.0 $\pm$ 0.3 |
| Sample       | Mix2           | Mix2-C3        | Mix3           | Mix3-C3        | Mix4           | Mix4-C3        | Stalk1-D       |
| $C_{nm}$ (%) | 67.5 $\pm$ 0.1 | 80.1 $\pm$ 0.3 | 72.8 $\pm$ 0.1 | 82.6 $\pm$ 0.3 | 71.5 $\pm$ 0.1 | 82.5 $\pm$ 0.6 | 60.0           |
| Sample       | Biowaste3-D    | Biowaste4-D    | Biowaste5-D    | Mix10-D1       | Mix10-D2       | Mix10-D3       | Sludge2-D      |
| $C_{nm}$ (%) | 68.0 $\pm$ 0.3 | 81.0 $\pm$ 1.1 | 73.4 $\pm$ 0.9 | 64.3 $\pm$ 1.3 | 68.7 $\pm$ 0.5 | 62.7 $\pm$ 1.6 | 60.8 $\pm$ 0.9 |
