# Supplementary material for: Predicting the Stability of Organic Matter Originating from Different Waste Treatment Procedures
Source: MDPI journal article supplement (doi:10.3390/ijerph20032151), 2023-01-25
Supplement: s1 [file s1]

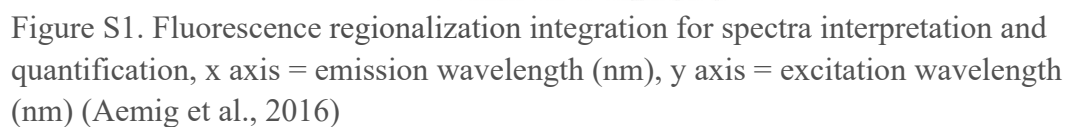

Aemig, Q., Cheron, C., Delgenes, N., Jimenez, J., Houot, S., Steyer, J.-P., Patureau, D. 2016. Distribution of Polycyclic Aromatic Hydrocarbons (PAHs) in sludge organic matter pools as a driving force of their fate during anaerobic digestion. *Waste Management*, **48**, 389-396.
